# Supplementary material
Source: publisher figshare collection journal article supplement (https://acs.figshare.com/ndownloader/files/4783363)

## Supporting Information

**Figure 1S**

Chemical cross-linking. Synthesized RH50, RHCC, RHNQ or RHCys domain peptides (40  $\mu$ M) were incubated with BS<sup>3</sup> cross-linker for 30 min at 25 °C respectively and the reaction was stopped by the addition of 0.1M Tris. Cross-linked products were analyzed by a 15% Tris-tricine gel.

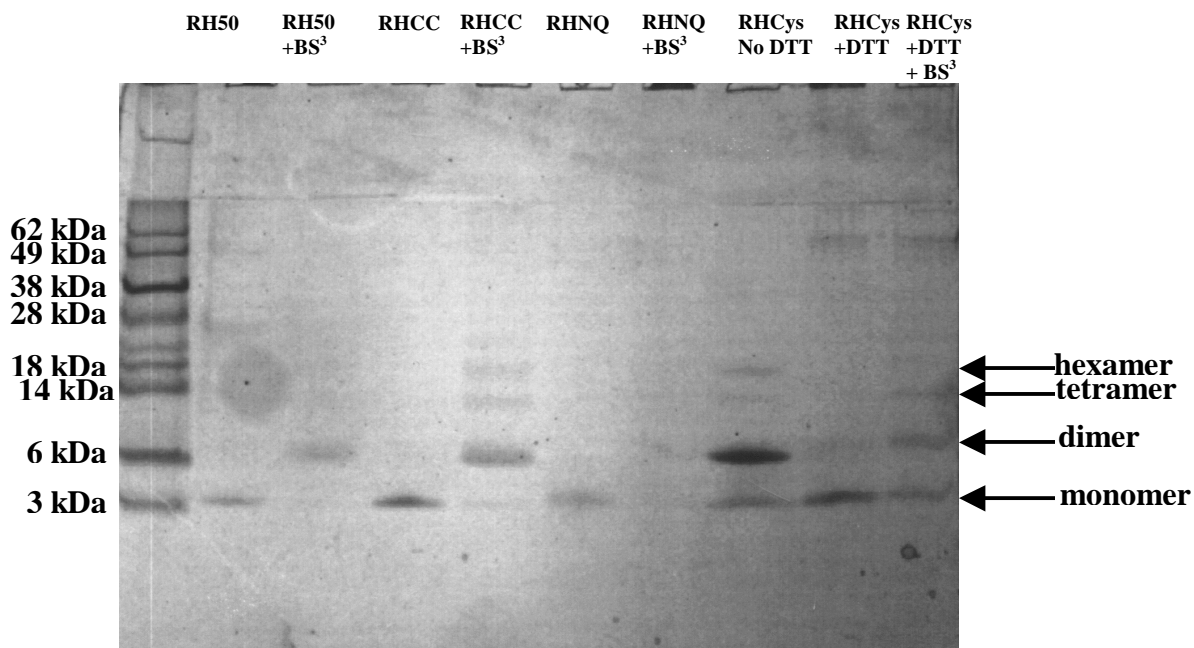

**Figure 2S**

A: 1D  $^1\text{H}$  spectrum of RH50 (0.5mM, pH 7.5) collected at 35 °C at 600 MHz.  
B: 1D  $^1\text{H}$  spectrum of RHNQ (3mM, pH 7.5) collected at 35 °C at 300 MHz.

A

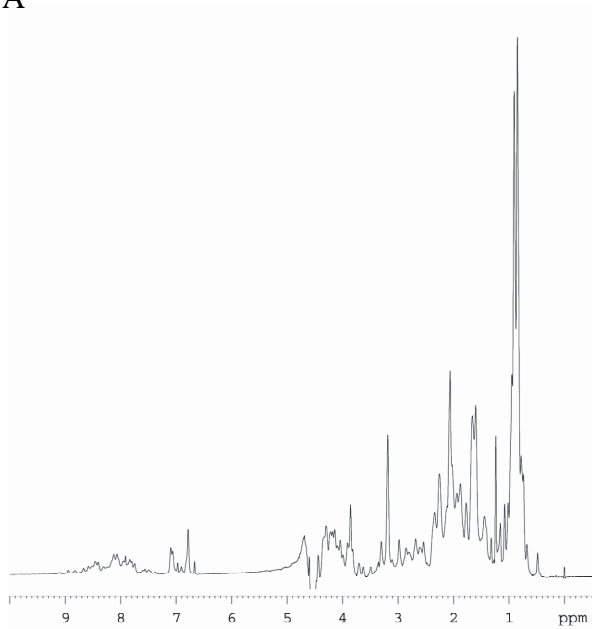

B

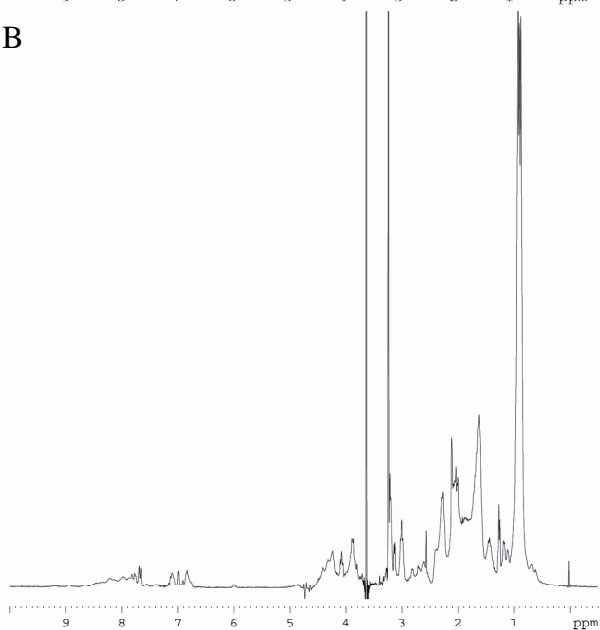

Supplement: Supplementary file 1 [file 4783363]
